# Supplementary material for: Integrative analysis of TP53 mutations in lung adenocarcinoma for immunotherapies and prognosis
Source: PubMed Central journal article supplement (PMC10114340; doi:10.1186/s12859-023-05268-2), 2023-04-18
Supplement: 12859_2023_5268_MOESM3_ESM.pdf [file 12859_2023_5268_MOESM3_ESM.pdf]

normal

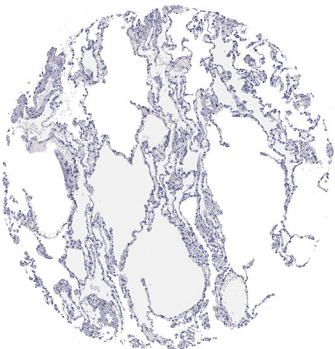

TP53-HPA2417

tumor

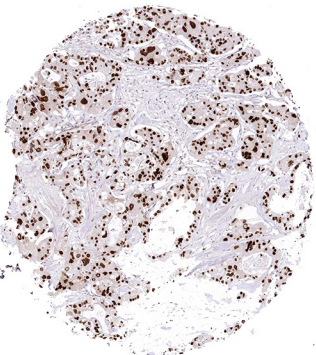

TP53-HPA2393

tumor

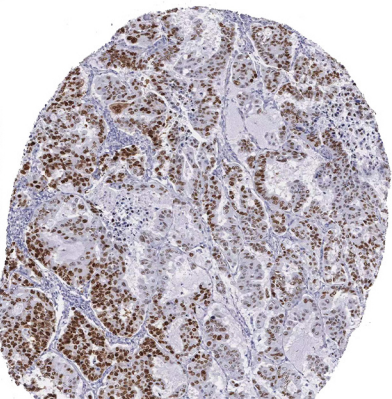

TP53-HPA1847

tumor

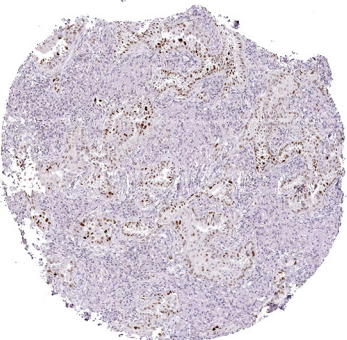

TP53-HPA2777
