# Supplementary material for: Integrative analysis of TP53 mutations in lung adenocarcinoma for immunotherapies and prognosis
Source: PubMed Central journal article supplement (PMC10114340; doi:10.1186/s12859-023-05268-2), 2023-04-18

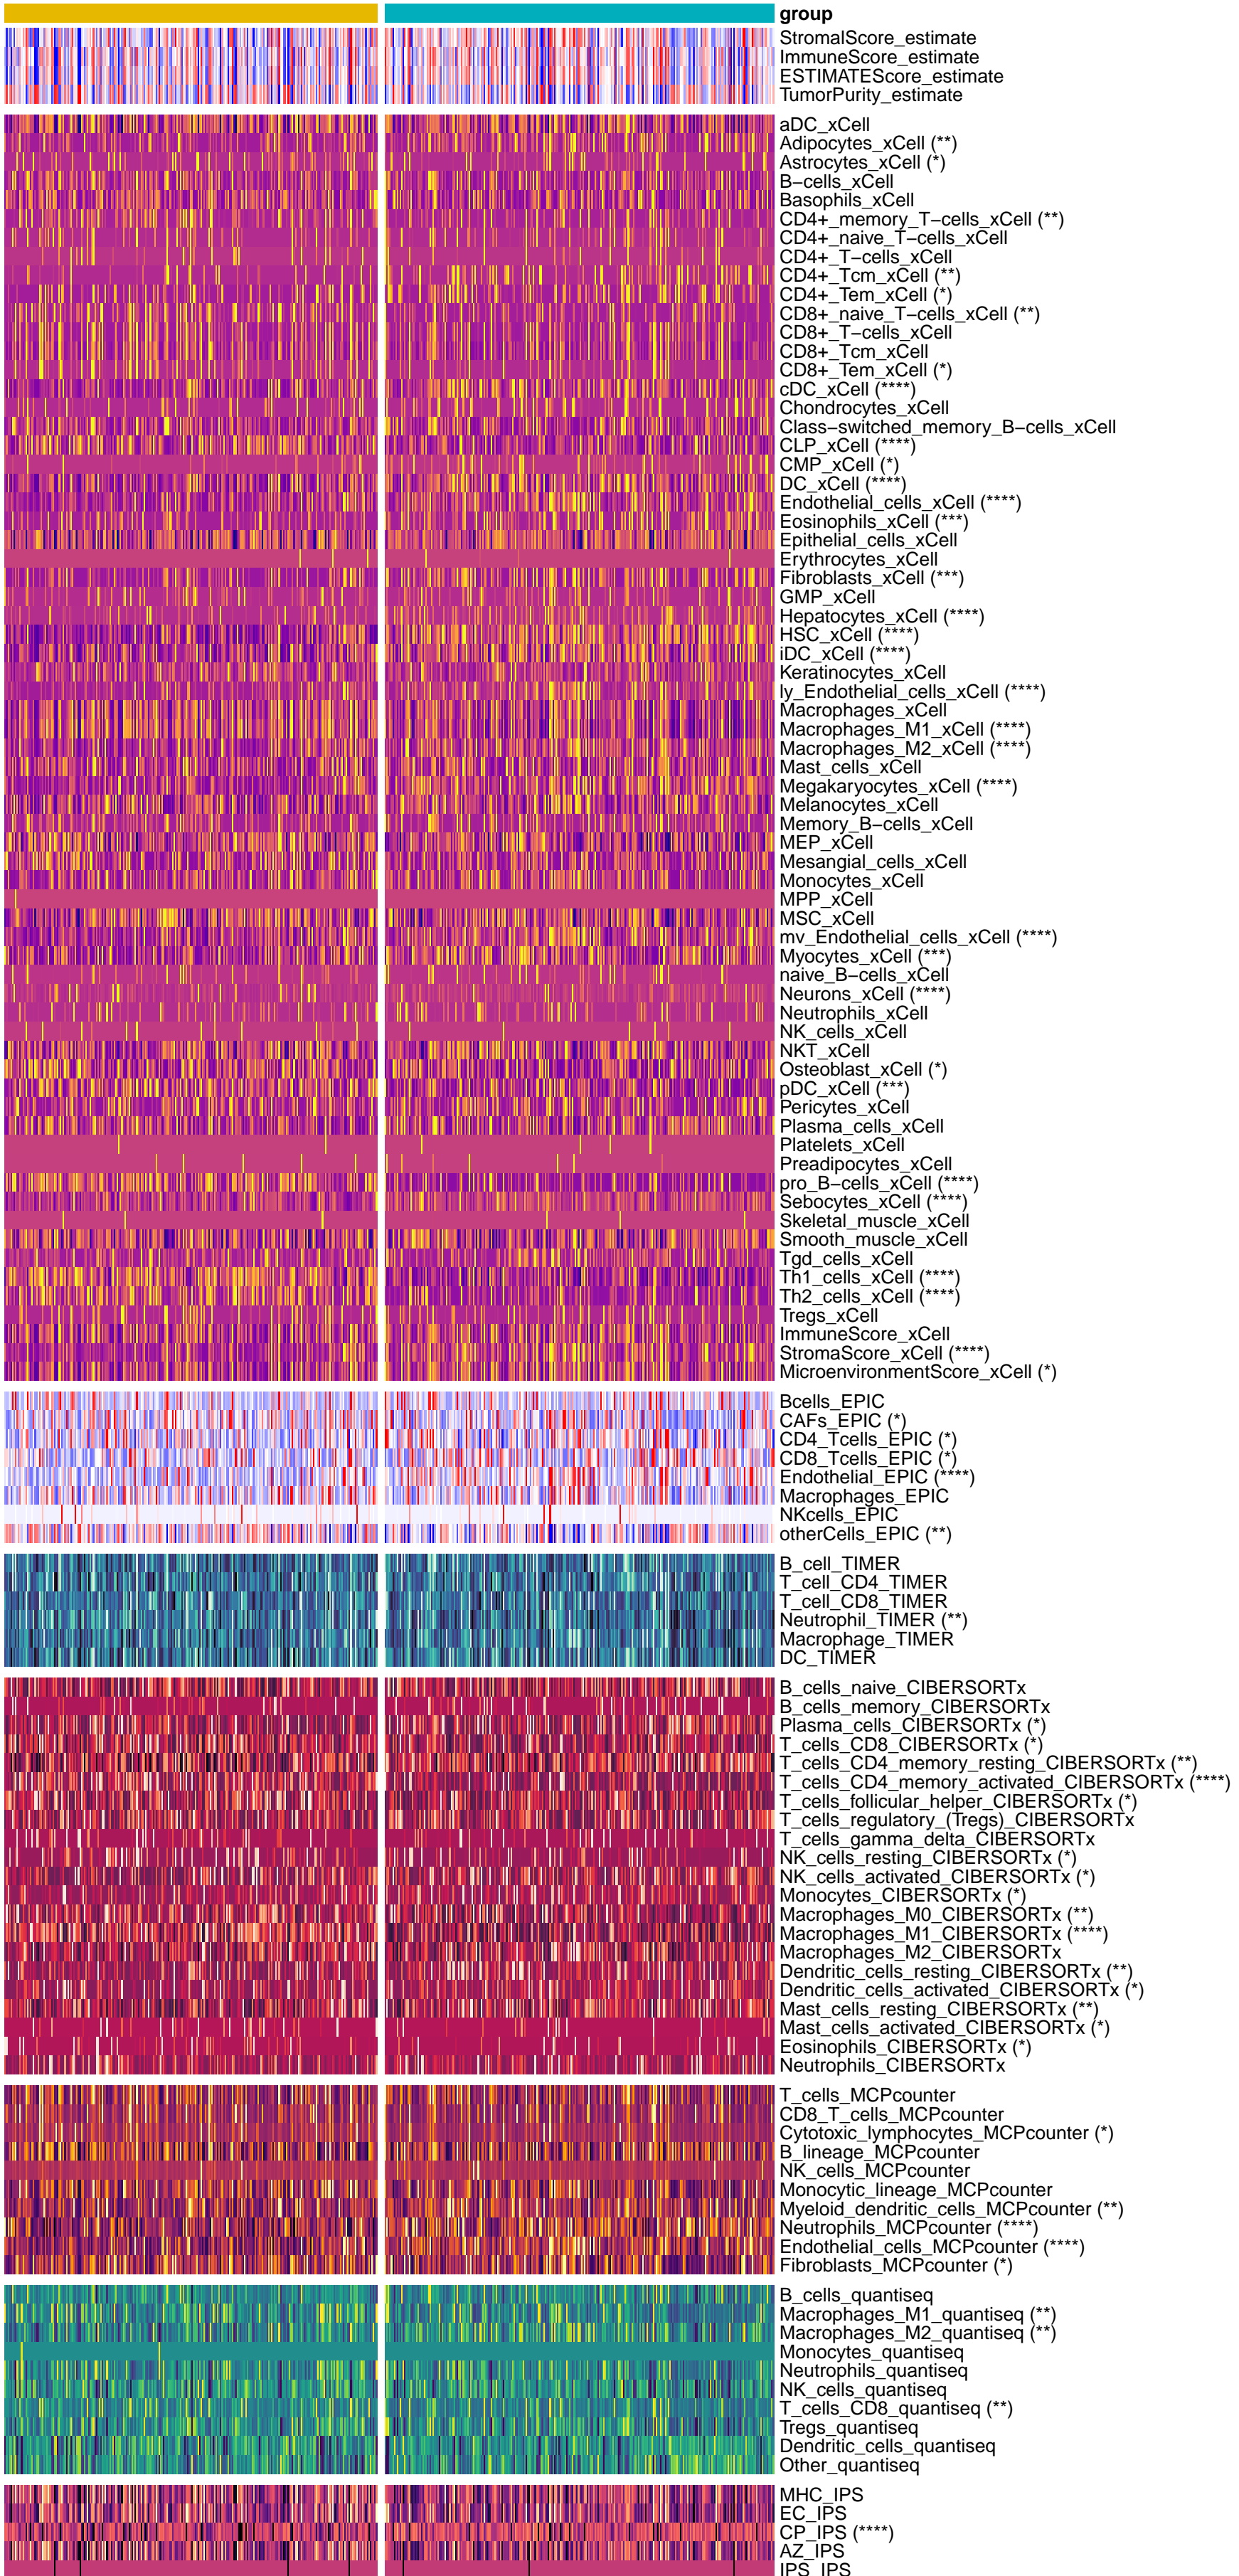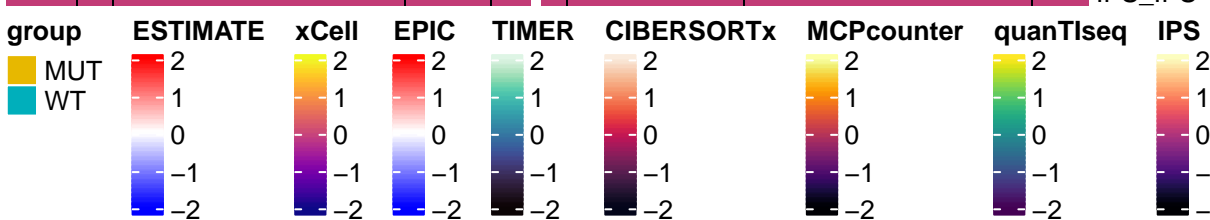

Supplement: 12859_2023_5268_MOESM4_ESM.pdf [file 12859_2023_5268_MOESM4_ESM.pdf]
